1 **Hif-1alpha stabilisation is protective against infection in a zebrafish model of**  
2 **comorbidity**

3

4 \*<sup>1,2,3</sup>Yves Schild, \*<sup>1,2</sup>Abdirizak Mohamed, \*<sup>1,2</sup>Edward J. Wootton, <sup>1,2</sup>Amy Lewis, and  
5 <sup>1,2</sup>Philip M. Elks

6

7 <sup>1</sup>The Bateson Centre, University of Sheffield, Western Bank, Sheffield, UK.

8 <sup>2</sup>Department of Infection, Immunity and Cardiovascular Disease, University of  
9 Sheffield, Western Bank, Sheffield, UK.

10 <sup>3</sup>Universität Duisburg Essen, Forsthausweg 2, 47057 Duisburg, Germany

11 \* These authors contributed equally.

12

13 Corresponding author:

14 Dr Philip M. Elks

15 The Bateson Centre,

16 University of Sheffield,

17 Firth Court,

18 Western Bank,

19 Sheffield,

20 South Yorkshire,

21 S10 2TN.

22 UK

23 Tel: +44 (0) 1142 223609

24 [p.elks@sheffield.ac.uk](mailto:p.elks@sheffield.ac.uk)

25

## 26 **Abstract**

27 Multi-drug resistant tuberculosis is a worldwide problem and there is an urgent need  
28 for host-derived therapeutic targets, circumventing emerging drug resistance. We  
29 have previously shown that hypoxia inducible-1 $\alpha$  (Hif-1 $\alpha$ ) stabilisation helps the host  
30 to clear mycobacterial infection via neutrophil activation. However, Hif-1 $\alpha$  stabilisation  
31 has also been implicated in chronic inflammatory diseases caused by prolonged  
32 neutrophilic inflammation. Comorbid infection and inflammation can be found together  
33 in disease settings, so it is unclear as to whether Hif-1 $\alpha$  stabilisation would be  
34 beneficial in a holistic disease setting. Here, we set out to understand the effects of  
35 Hif-1 $\alpha$  on neutrophil behaviour in disease-relevant settings by combining two well-  
36 characterised *in vivo* zebrafish models: TB infection (*Mycobacterium marinum*  
37 infection) and wounding (tailfin transection). We demonstrate during systemic  
38 infection, that wounding leads to increased infection burden, but the protective effect  
39 of Hif-1 $\alpha$  stabilisation remains. A local Mm infection near to the tailfin wound site  
40 caused neutrophil migration between sites that was reduced by Hif-1 $\alpha$  stabilisation.  
41 Our data indicate that the protective effect of Hif-1 $\alpha$  against Mm is maintained in the  
42 presence of inflammation, highlighting its potential as a host-derived target against TB  
43 infection in a disease relevant setting.

44

## 45 **Introduction**

46 Multi-drug resistance is an increasing problem worldwide and in 2017 WHO estimated  
47 that there were 490,000 cases of multi-drug resistant *Mycobacterium tuberculosis*  
48 infections (the cause of tuberculosis), alongside 600,000 new cases with resistance to  
49 the front-line drug rifampicin [1]. There is an urgent and unmet need for host-derived  
50 therapeutic targets that would circumvent the problems of emerging drug-resistance

51 and could work in combination with current antimicrobials to completely clear patients  
52 of TB burden more rapidly [2].

53 Neutrophil activation is often viewed as a double-edged sword in terms of disease  
54 control [3]. Neutrophils must distinguish between sterile and infected tissue injuries to  
55 determine an appropriate response [4], one that strikes a balance between infection  
56 control and tissue damage, but the mechanisms behind this are not well understood  
57 in complex *in vivo* tissue environments, partially due to a lack of appropriate models.  
58 Damage associated molecular patterns (DAMPs) and pathogen associated molecular  
59 patterns (PAMPs) share some receptor repertoires and downstream signalling  
60 components, but there is evidence to suggest that neutrophils can differentiate  
61 between these signals [5]. Neutrophils are involved early in TB infection with influx  
62 associated with killing of bacteria in a number of cellular and animal models [3,6–8],  
63 but their function during mycobacterial infection is not well characterised. Neutrophils  
64 are important in infection control, however, they are also the drivers of many chronic  
65 inflammatory diseases such as chronic obstructive pulmonary disease (COPD) [9].  
66 Neutrophils are one of the first immune cell types to respond to tissue injury and  
67 migrate to the wound to clear up fragments of cells and protect against pathogen  
68 invasion [10]. However, in order for wounds to heal, neutrophilic inflammation must  
69 resolve, either by programmed cell death (apoptosis), or by movement away from the  
70 wound in a process called reverse migration [11,12]. If neutrophils persist, then  
71 degranulation occurs leading to release of toxic components, further tissue damage,  
72 and consequent neutrophil recruitment; a vicious cycle of chronic inflammation that  
73 underpins many inflammatory diseases like COPD.

74 Chronic diseases, such as TB and COPD, often do not occur individually but exist  
75 together in patients, a situation called a comorbidity. This is especially true of TB, as

76 one-third of the world's population live healthily with latent TB infection for decades  
77 before a "second-hit" comorbidity leads to progression to active TB [13]. The best  
78 characterised comorbidities are co-infections with other communicable diseases, most  
79 notably HIV which causes immune deficiency and allows TB to breakout of  
80 granulomas leading to active disease [1]. However, at the same time as anti-retroviral  
81 therapy is bringing HIV under greater control, there is an alarming rise in non-  
82 communicable diseases, such as diabetes and COPD, in the same populations that  
83 have been linked to TB activation [13,14]. Many of these non-communicable diseases  
84 have an inflammatory component, yet treatment of these diseases, and indeed TB  
85 itself, is currently tailored towards the single condition rather than considering the  
86 holistic outcome of the comorbidity [15]. This is reflected in animal models, used to  
87 investigate cellular and molecular mechanisms of disease, often being based on a  
88 single condition rather than considering comorbidities, and there is a pressing need  
89 for combined models to understand the complex interactions of cells *in vivo*.

90 Neutrophils are exquisitely sensitive to low levels of oxygen (hypoxia), which pro-longs  
91 their lifespan and increases their bactericidal mechanisms [12,16,17]. The cellular  
92 response to hypoxia involves the activation and stabilisation of hypoxia inducible  
93 factor-1 $\alpha$  (HIF-1 $\alpha$ ) transcription factor [18,19]. We have previously demonstrated that  
94 activating neutrophils, via stabilisation of Hif-1 $\alpha$ , is host protective during *in vivo*  
95 mycobacterial infection; a good therapeutic outcome [20]. However, hypoxia and Hif-  
96 1 $\alpha$  have also been shown to delay neutrophil apoptosis and reverse migration of  
97 neutrophils away from wounds in chronic inflammation models; a bad therapeutic  
98 outcome [12,21]. Therefore, the beneficial effects of Hif-1 $\alpha$  stabilisation on a holistic-  
99 scale during infection remains unclear, due to the potential for neutrophil damage and  
100 chronic inflammation.

101 The zebrafish has become an invaluable animal model for TB and inflammatory  
102 disease over the last fifteen years [22]. Zebrafish embryos are transparent and  
103 development of immune transgenic lines has allowed unprecedented access to track  
104 immune cell dynamics inside an intact organism using fluorescence microscopy.  
105 Infection of zebrafish larvae with *Mycobacterium marinum* (Mm), a closely related  
106 strain to human Mtb and a natural fish pathogen, has been used to identify important  
107 molecular mechanisms involved in TB pathogenesis and granuloma formation [23].  
108 The development of innate immune cell transgenic lines began with neutrophil labelled  
109 lines, and these have been used over the last decade in tailfin transection models to  
110 better understand the molecular mechanisms involved in both neutrophil recruitment  
111 to, and reverse migration from, a site of inflammation [12,24,25].  
112 Here, we investigated the effects of Hif-1 $\alpha$  stabilisation on neutrophil dynamics in dual-  
113 models of infection and wounding by combining well-characterised zebrafish Mm  
114 infection and tailfin transection models [12,20]. During systemic infection, neutrophil  
115 inflammation dynamics at the tailfin wound occur as normal while presence of a wound  
116 exacerbates infection burden. By switching to a localised infection we show that  
117 interaction between tailfin inflammation neutrophils and the site of infection occurs if  
118 cells are close enough to each other and that infection can attract neutrophils away  
119 from the tailfin wound prematurely. Stabilising Hif-1 $\alpha$  caused preferential migration to  
120 the infection site and delayed premature neutrophil migration away from the tailfin  
121 wound to the site of infection, indicating that Hif-1 $\alpha$  neutrophils are more sensitive to  
122 infection/wound gradients and are more likely to be retained in response to tissue  
123 challenge. Hif-1 $\alpha$  stabilisation was effective at controlling systemic infection in the  
124 dual-model despite it prolonging neutrophil inflammation at the wound site. These data  
125 show that, on a local scale, stabilisation of Hif-1 $\alpha$  can alter neutrophil migration

126 dynamics, but that, on an entire organism level, the protective effect of Hif-1 $\alpha$   
127 stabilisation against infection remains. These findings demonstrate that comorbidities  
128 may have multiscale effects ranging from the local tissue level to the holistic level and  
129 highlight that the zebrafish is a promising model to investigate both levels of effects.  
130 Although stabilisation of Hif-1 $\alpha$  has detrimental effects on neutrophil inflammation  
131 resolution, the dual-model highlights that it is a promising drug target against TB, even  
132 in the presence of an inflammatory comorbidity.

133

## 134 **Materials and methods**

135

### 136 **Zebrafish husbandry**

137 All the zebrafish used in this project were raised in the University of Sheffield Home  
138 Office approved aquarium and were kept under standard protocols as previously  
139 outlined [26]. Adult zebrafish were kept in tanks of no more than 40 adult fish, and  
140 experience a 14-hour light and 10-hour dark cycle. A recirculating water supply is  
141 maintained and the temperature of the water is kept at 28°C. Embryos for this study  
142 were generated by in-crossing *TgBAC(mpx:Gal4.VP16);Tg(UAS:Kaede)i222* or  
143 *Tg(mpx:GFP)i114* [25,27].

144

### 145 **Ethics**

146 All procedures over the course of this project were performed on embryos that were  
147 less than 5.2 days post fertilisation (dpf) and were therefore considered outside of the  
148 Animals (Scientific Procedures) Act. Procedures were carried out to standards set by  
149 the UK Home Office on the Project Licence P1A4A7A5E held by Professor Stephen  
150 Renshaw at the University of Sheffield.

151

## 152 **Tailfin transection**

153 For all experiments, larval tailfins were transected at 48 hours post fertilisation (hpf)  
154 as previously described [12]. Kaede-expressing wound neutrophils were  
155 photoconverted at 4 hours post wound (hpw) using a SOLA light engine white light  
156 LED (Lumencor, USA) through DAPI filters on a Leica DMI8 inverted widefield  
157 microscope (Leica Microsystems, Germany). Timelapse microscopy was performed  
158 using a Leica DMI8 inverted widefield microscope (Leica Microsystems, Germany)  
159 using a HC FL PLAB 10x/0.40 lens and captured using a Hamamatsu ORCA-Flash  
160 4.0 camera (Hamamatsu, Japan). Neutrophil counts were performed with the  
161 investigator blinded to the experimental group on a Leica MZ10 F Stereomicroscope  
162 with fluorescence (Leica Microsystems, Germany).

163

## 164 ***Mycobacterium marinum* infection**

165 Mm infection experiments were performed using *M. marinum* M (ATCC #BAA-535),  
166 containing a psMT3-mCherry or psMT3 mCrimson vector [28]. Injection inoculum was  
167 prepared from an overnight liquid culture in the log-phase of growth resuspended in  
168 2% polyvinylpyrrolidone40 (PVP40) solution (CalBiochem) as previously described  
169 [20].

170 For systemic infection 150-200 colony forming units (CFU) were injected into the  
171 caudal vein at 28-30hpf, as previously described [29].

172 For localised somite infection, fish were anaesthetised in 0.168 mg/ml Tricaine  
173 (Sigma-Aldrich) and were microinjected with 500CFU (colony forming units) of Mm in  
174 the 26<sup>th</sup>-27<sup>th</sup> somite [30].

175

176 **Hif-1 $\alpha$  stabilisation**

177 Embryos were injected with dominant active *hif-1ab* (ZFIN: hif1ab) variant RNA at the  
178 one cell stage as previously described [12,31]. Phenol red (PR) (Sigma Aldrich) was  
179 used as a vehicle control.

180 Hif-1 $\alpha$  was stabilised pharmacologically using hydroxylase inhibitors FG4592, 5 $\mu$ M or  
181 DMOG, 100 $\mu$ M (dimethyloxaloylglycine), with DMSO control.

182

183 **Bacterial pixel count**

184 Infected zebrafish larvae were imaged at 4 days post infection (dpi) on an inverted  
185 Leica DMI8 with a 2.5x objective lens. Brightfield and fluorescent images were  
186 captured using a Hammamatsu OrcaV4 camera. Bacterial burden was assessed using  
187 dedicated pixel counting software as previously described [20,32].

188

189 **Image and Statistical Analysis**

190 Microscopy data was analysed using Leica LASX (Leica Microsystems, Germany) and  
191 Image J software. All data were analysed (Prism 7.0, GraphPad Software) using t-  
192 tests for comparisons between two groups and one-way ANOVA (with Bonferonni  
193 post-test adjustment) for other data. P values shown are: \* $P < .05$ , \*\* $P < .01$ , and \*\*\* $P$   
194  $< .001$ .

195

196 **Results**

197

198 **Infection induced neutrophil emergency haematopoiesis and increased**  
199 **neutrophilic inflammation to the detriment of infection control**



200 Infection and inflammation commonly occur in the same individual during disease, yet  
201 many *in vivo* experimental systems investigate immune responses to these processes  
202 independently of each other. We set out to develop *in vivo* zebrafish models of  
203 infection and inflammation, that we have termed “dual-models”. Initially we combined  
204 two well-defined models; a *Mycobacterium marinum* (Mm) model of systemic infection  
205 (injection of bacteria into the caudal vein at 30-32 hours post fertilisation (hpf) and  
206 assessing bacterial burden at 4 days post infection (dpi)) and a tailfin wound model of  
207 neutrophilic inflammation (transection of the tailfin at 2 days post fertilisation (dpf) with  
208 neutrophil inflammation resolving at 24 hours post wound (hpw)) [33,34] (Figure 1A).  
209 We first assessed whether injury at the caudal vein (the site of Mm infection) caused  
210 by the microinjection process itself would affect neutrophil behaviour at the tailfin  
211 wound. Injection of PVP into the caudal vein (mock infection control) caused no  
212 difference to the number of neutrophils at the peak of recruitment to the tailfin wound  
213 (6hpw), nor after neutrophil inflammation resolution at 24hpw (not injected, NI,  
214 compared to PVP injected) (Figure 1B).  
215 The presence of systemic Mm infection increased neutrophil number at the wound at  
216 both the 6hpw and 24hpw timepoints compared to NI and PVP controls (Figure 1B).  
217 Although overall neutrophil numbers were increased by infection at 6hpw and 24hpw,  
218 the resolution of neutrophil inflammation still occurred (Figure 1B). Infection levels  
219 were measured in the dual-model using fluorescent Mm and assessing bacterial  
220 burden at 4dpi. Levels of Mm infection were significantly increased in the presence of  
221 neutrophilic inflammation at the wound site compared to non-wounded controls  
222 (Figure 1C) indicating that the presence of localised tailfin inflammation is detrimental  
223 to infection control. We assessed whole body neutrophil counts after Mm infection

224 without a tailfin injury and confirmed that total neutrophil number was increased after  
225 Mm infection (Figure 1D-E) consistent with emergency haematopoiesis [35].

226

### 227 **Neutrophils distributed to local infection and wound sites**

228 To investigate neutrophil migration to infection and wound stimuli in a dual-model we  
229 challenged 3dpf zebrafish larvae with a tailfin wound immediately followed by a local  
230 somite infection into the 26-27<sup>th</sup> somite (Mm or PVP mock infection control) and  
231 counted neutrophils at each site over time (Figure 2A). When challenged with Mm  
232 infection alone or tailfin wound alone, neutrophils from the caudal haematopoietic  
233 tissue (CHT) and surrounding areas migrated to each respective site and peaked at  
234 4-6hpw/i (Figure 2B-D). Of note, some neutrophils were present at the site of infection  
235 before challenge (on average 10 neutrophils) due to the natural distribution of  
236 neutrophils at this stage, with very few present at the end of the tail (the wound site,  
237 <5 neutrophils) (Figure 2B-D). When tailfin wounding was followed by PVP injection  
238 (as a mock infection control), neutrophils migrated to both the somite PVP site and the  
239 tailfin wound site, indicating that a wound in the somite was sufficient to attract  
240 neutrophils, while neutrophils were still able to migrate beyond this to the tailfin wound  
241 (although to a lesser extent than wound alone, Figure 2B-D). When tailfin wound was  
242 followed by somite Mm infection, neutrophils migrated to the somite infection site at  
243 the expense of tailfin wound neutrophils (Figure 2B-D). These data indicate that the  
244 signal gradient caused by Mm infection is additive to that of the somite injury alone  
245 and that neutrophils preferentially migrate to Mm and are retained at infection rather  
246 than travelling further along the trunk to the tailfin wound.

247

248 **Neutrophils preferentially migrated to a new infection stimulus rather than**  
249 **patrol a wound site**

250 In a single model of tailfin wound, once neutrophils have migrated to a wound site  
251 (between 1-6hpw), they are retained at the wound, patrolling until the resolution phase  
252 of inflammation (6-12hpw) [12,25]. We have previously demonstrated that neutrophils  
253 migrate away from the wound by a diffusion process at around 8-12hpw when  
254 neutrophils become desensitised to signals that retains them at the wound [36]. We  
255 hypothesised that infection can overcome this retention signal at the wound site and  
256 attract neutrophils prematurely away from the wound. We therefore developed a dual  
257 model where, at 4hpw, a localised Mm infection was introduced into the 26-27<sup>th</sup> somite  
258 (Figure 3A). 4hpw is a timepoint at which neutrophils are still being recruited to the  
259 wound and would not have started to reverse migrate away in a single wound model,  
260 a process that normally occurs after 6-12hpw [10,12]. Photoconversion of  
261 *Tg(mpx:Gal4/UAS:Kaede)* neutrophils at the tailfin wound at 4hpw allowed  
262 identification of neutrophils that had visited the wound (“wound experienced” red  
263 neutrophils), compared to those that had not (“wound naïve” green neutrophils)  
264 (Figure 3B). We demonstrated that injection of Mm into the 26-27<sup>th</sup> somite was  
265 sufficient to attract neutrophils away from the wound (wound experienced neutrophils)  
266 between 4hpw-6hpw (Figure S1). By 100mpc (minutes post conversion) almost all  
267 wound-experienced neutrophils had been attracted away from the tailfin wound by  
268 infection (Figure 3D). These data demonstrate that the “second hit” of infection was  
269 sufficient to overcome signalling that retains neutrophils at the initial tailfin wound site.

270

271 **Hif-1 $\alpha$  stabilisation retained neutrophils at infection at the expense of migration**  
272 **to tailfin wound**

273 Hypoxia signalling, via stabilisation of Hif-1 $\alpha$ , has profound effects on neutrophil  
274 behaviours and antimicrobial activity [12,20,21]. We set out to understand whether Hif-  
275 1 $\alpha$  stabilisation affected neutrophil behaviour in our dual models of infection and  
276 inflammation. Endogenous Hif-1 $\alpha$  was stabilised pharmacologically using the  
277 hydroxylase inhibitors FG4592 and DMOG [12] 4 hours before infection with Mm into  
278 the 26-27th muscle somite. This was followed by immediate tailfin wound and  
279 neutrophil numbers were counted at each site at 6pw/i (Figure 4A). The solvent control  
280 for both hydroxylase inhibitors (DMSO), caused no difference in neutrophil migration  
281 to infection and wound at 6hpw/i compared to untreated larvae (Figure 4B-F).  
282 Treatment with either FG5492 or DMOG caused significantly increased neutrophil  
283 migration to the infection site with fewer neutrophils migrating to the tailfin wound  
284 compared to DMSO controls (Figure 4B-F). These findings were confirmed by genetic  
285 stabilisation of Hif-1 $\alpha$  using dominant active Hif-1 $\alpha$  (Figure 4G-I). These data suggest  
286 that neutrophils primed with Hif-1 $\alpha$  are more sensitive to the local infection chemokine  
287 gradient at the expense of the more distant gradient emanating from the wound.

288

### 289 **Hif-1 $\alpha$ stabilisation delayed wound-experienced neutrophil migration to Mm** 290 **infection**

291 We have previously demonstrated, in a single tailfin wound model, that stabilisation of  
292 Hif-1 $\alpha$  delays neutrophil reverse migration away from the wound [12]. However, here  
293 we show that a local Mm infection is able to attract neutrophils away from the tailfin  
294 wound prematurely (Figure 3). We therefore hypothesised that Hif-1 $\alpha$  would prevent  
295 wound-experienced neutrophils from exiting the injury site prematurely to migrate to a  
296 localised infection site. Wound-naïve neutrophil attraction to the site of Mm infection  
297 was not altered by DA Hif-1 $\alpha$  compared to phenol red (PR) controls (Figure 5A-B).

298 Infection was sufficient to attract wound-experienced neutrophils away from the wound  
299 prematurely, but DA Hif-1 $\alpha$  neutrophils were significantly delayed in their migration  
300 towards localised Mm infection compared to PR controls (Figure 5B-C). The migration  
301 speed of wound-experienced neutrophils was lower in the DA Hif-1 $\alpha$  group compared  
302 to the PR group, largely due to their tighter association to the wound edge and less  
303 migration away (Figure 5D). This decrease in migration speed was more marked in  
304 wound-experienced neutrophils that were successful in migrating away from the  
305 wound edge towards the Mm infection site (Figure 5E). These neutrophils migrated to  
306 the infection site at two-thirds of the speed in DA Hif-1 $\alpha$  embryos compared to the PR  
307 controls (Figure 5E). Furthermore, they took a less direct route to the infection, with  
308 the meandering index of these neutrophils significantly lower in the DA Hif-1 $\alpha$  group  
309 compared to PR controls (Figure 5F). These data indicate that Hif-1 $\alpha$  stabilised  
310 neutrophils remain more sensitive to the wound signalling gradient, even if successful  
311 in escaping the wound to a second hit of infection. It is interesting to note that, in many  
312 cases, wound-experienced neutrophils migrating away from the wound in the DA Hif-  
313 1 $\alpha$  group dithered between the wound and infection sites, with a shuttling movement  
314 backwards and forwards, a behaviour not observed in PR controls (Movie S1).  
315 Dithering between infection and wound sites was also not observed in DA Hif-1 $\alpha$   
316 wound-naïve neutrophils in the same individual larvae, suggesting a difference  
317 between wound-experienced and wound-naïve neutrophils in their detection of the two  
318 stimuli.

319 Taken together, these data indicate that wound-experienced neutrophils in Hif-1 $\alpha$   
320 stabilised larvae remain more sensitive to the wound gradient and are less likely to  
321 migrate to the second hit infection site compared to normal controls.

322

323 **Mm burden was decreased by Hif-1 $\alpha$  stabilisation, despite delayed resolution of**  
324 **neutrophilic inflammation**

325 In the single model of Mm infection we have previously shown that Hif-1 $\alpha$  stabilisation  
326 reduced bacterial burden; a good therapeutic outcome [20]. However, in the single  
327 tailfin model, Hif-1 $\alpha$  delayed neutrophil inflammation resolution away from the wound;  
328 a bad therapeutic outcome in diseases of chronic inflammation [12]. As infection and  
329 chronic inflammation are common attributes of comorbidities, we investigated whether  
330 the beneficial therapeutic outcome of Hif-1 $\alpha$  stabilisation in infection would be  
331 maintained in the presence of chronic inflammation.

332 We observed an increase in neutrophil recruitment to the tailfin wound after Mm  
333 infection (at 6hpw) in PR controls (Figure 6A-B), in keeping with the emergency  
334 hematopoietic effect of infection observed earlier (Figure 1E). No effect of DA Hif-1 $\alpha$   
335 was observed on neutrophil recruitment compared to PR controls (Figure 6B),  
336 consistent with previous observations in the single tailfin transection model [12].  
337 Neutrophil numbers at the wound after resolution, at 24hpw were increased by DA Hif-  
338 1 $\alpha$  compared to PR controls in the presence (Mm) or absence (PVP) of Mm infection  
339 (Figure 6C) and the percentage resolution (6-24hpw) was reduced by Hif-1 $\alpha$   
340 stabilisation compared to PR controls (Figure 6D), indicating that Hif-1 $\alpha$  stabilisation  
341 delays neutrophil inflammation resolution in the presence of systemic infection.

342 DA Hif-1 $\alpha$  larvae had decreased bacterial burden compared to PR controls indicating  
343 that the protective effects of Hif-1 $\alpha$  stabilisation remained, even in the presence of  
344 tailfin inflammation (Figure 7A-C). This is despite our finding that an inflammatory  
345 process (tailfin wound) during systemic infection caused a marked increase in infection  
346 levels in the absence of Hif-1 $\alpha$  stabilisation (Figure 7B-C). These results indicate that

347 Hif-1 $\alpha$  remains protective against Mm even when neutrophil inflammation resolution  
348 is delayed at the tailfin.

349

## 350 **Discussion**

351 With the emergence of antibiotic resistance, there is increasing interest to find host-  
352 derived factors that could act as therapeutic targets [2]. We have previously identified  
353 targeting neutrophils in zebrafish *in vivo* models of tuberculosis infection as a  
354 mechanism to decrease infection burden via Hif-1 $\alpha$  stabilisation [20]. Physiological  
355 hypoxia and Hif-1 $\alpha$  stabilisation have been demonstrated to have activating effects on  
356 neutrophils in a growing number of models, increasing their antimicrobial capabilities  
357 *in vitro*, *ex vivo* and *in vivo* [16,17]. These findings have been tempered by clinical  
358 observations that activated neutrophils are associated with chronic disease, leading  
359 to excess tissue damage and poor disease outcomes [11,21]. Signs of Hif-1 $\alpha$   
360 stabilisation being detrimental to inflammation resolution were also observed in a  
361 zebrafish tailfin wound where resolution of neutrophil inflammation is delayed,  
362 however no further adverse defects were seen [12]. Patient studies address neutrophil  
363 behaviour at the chronic stages of disease by which time there is a cycle of neutrophil  
364 overactivation, degranulation, tissue damage and further recruitment. Targeting  
365 neutrophils at earlier disease stages could therefore be highly beneficial before this  
366 chronic cycle can begin, but effects in patients with comorbid TB with inflammatory  
367 conditions such as COPD are unclear. Here we address the roles of activated  
368 neutrophils at infection and wound sites in an individual organism as a model of  
369 comorbid infection and inflammation.

370 We developed dual-infection/inflammation models to investigate the effects of Hif-1 $\alpha$   
371 on neutrophil migration to wound and infection sites simultaneously. Using localised

372 Mm infection and tailfin wound we found that neutrophils dispersed between infection  
373 and wound sites, but that when Hif-1 $\alpha$  was stabilised, neutrophils seldom migrated  
374 past the local infection to the tailfin wound. Hif-1 $\alpha$  stabilisation also retained  
375 neutrophils at the tailfin wound when a second hit of infection was introduced, while in  
376 wildtype larvae infection caused premature migration away from the wound to the  
377 infection site. These data indicate that Hif-1 $\alpha$  stabilisation causes increased sensitivity  
378 to wound or infection gradients, leading to retention of neutrophils and reduced ability  
379 of these cells to respond to competing signals.

380 Wound-naïve neutrophils were able to migrate to Mm at the same rate when Hif-1 $\alpha$  is  
381 stabilised, while wound-experienced neutrophils are slower to respond and remain at  
382 the wound for longer. In some instances, when Hif-1 $\alpha$  is stabilised the neutrophils  
383 seem unable to decide which stimuli to migrate to, shuttling between the two sites. Hif-  
384 1 $\alpha$  stabilisation caused no effect on neutrophil recruitment to the tailfin wound in the  
385 single inflammation model, therefore is unlikely to have effects on recruitment  
386 signalling [12]. Taken together, these data indicate that recognition of “retention  
387 signals” by neutrophils is sensitised by stabilised Hif-1 $\alpha$ , keeping neutrophils at the  
388 wound or infection site, and that there is an as yet unidentified molecular change in  
389 Hif-1 $\alpha$  stabilised neutrophils that alters their sensitivity to these tissue gradients. Likely  
390 candidates for Hif-1 $\alpha$  targets include G protein coupled receptors (GPCRs) that are  
391 involved in neutrophil migration (many chemokine receptors are GPCRs) and are  
392 regulated by Hif-1 $\alpha$  in immune cells (eg., CXCR1, CXCR2 or CXCR4) [37–41]. Cxcr1/2  
393 have been implicated in retention of neutrophils at a tailfin wound in zebrafish and we  
394 have recently demonstrated that decreasing Cxcr4 signalling causes premature  
395 reverse migration away from the tailfin wound [42].



396 We combined well-characterised models to address the outcomes of Hif-1 $\alpha$   
397 stabilisation on infection and inflammation. As well as demonstrating that the  
398 protective effect of Hif-1 $\alpha$  stabilisation during infection being maintained with a wound  
399 present, it is interesting to note that a tailfin wound was deleterious to the host,  
400 increasing the burden of Mm infection. We have previously demonstrated, in single  
401 models of wounding that there is robust upregulation of pro-inflammatory Il-1 $\beta$  in  
402 neutrophils after both Hif-1 $\alpha$  stabilisation and wounding [43,44]. These data indicate  
403 that stimulation of neutrophils by wounding and Hif-1 $\alpha$  have differential effects on the  
404 outcome of infection, and that if neutrophils are appropriately activated it can be  
405 beneficial on a whole-organism scale.

406 Previous work from our group demonstrated that, during the reverse migration phase,  
407 (>12hpw) wound-experienced neutrophils reverse migrating away from the wound  
408 towards a range of infection stimuli (*Staphylococcus aureus* and zymosan) display  
409 unaltered migration behaviour compared to nearest-neighbour, wound-naive  
410 neutrophils [30]. In the absence of Hif-1 $\alpha$  stabilisation, this appears to be the case in  
411 our Mm/wounding model, with both wound-naïve and wound-experienced neutrophils  
412 able to respond to the secondary local infection. However, when Hif-1 $\alpha$  is stabilised  
413 differences in neutrophil migration behaviour become evident, and wound-  
414 experienced neutrophils change behaviour and are slower to migrate to the second  
415 hit, while wound-naïve neutrophils migrate as normal, indicating that neutrophils that  
416 have visited the wound can differ from those that have not.

417 We kept as many aspects of each individual model as close as possible to those  
418 published previously in order to avoid setting up a dual-model with undefined individual  
419 characteristics that would potentially complicate interpretation [12,20]. As  
420 investigations of comorbidities increase we anticipate that dual-models will increase

421 in popularity, but with a plethora of possible combinations and timings of stimuli  
422 available, care will be required to understand the relevance of these models to disease  
423 situations.

424 Using dual-models of infection and wounding we have highlighted that comorbidity is  
425 likely to have a range of effects on neutrophil behaviour during infection that differ on  
426 the local tissue scale compared to the whole-organism, holistic level. Although Hif-1 $\alpha$   
427 stabilisation could be detrimental at local level inflammation, our dual-models suggest  
428 that on a whole-organism level neutrophil activation by  $\alpha$  stabilisation is not harmful  
429 and could be a promising host-derived treatment strategy against TB.

430

#### 431 **Acknowledgements**

432 The authors would like to thank The Bateson Aquarium Team for fish care and the IICD  
433 Technical Team for practical assistance (University of Sheffield). Thanks to Stephen Renshaw  
434 (University of Sheffield) for constructive comments on the manuscript.

435

#### 436 **Conflicts of Interests**

437 The authors declare that they have no conflict of interest.

438

#### 439 **Funding**

440 AL and PME are funded by a Sir Henry Dale Fellowship jointly funded by the Wellcome  
441 Trust and the Royal Society (Grant Number 105570/Z/14/Z) held by PME. YS  
442 internship with PME was funded by The Erasmus Programme.

443

#### 444 **Author Contributions**

445 Conceived and designed the experiments: YS, AM, EJW, PME. Performed the  
446 experiments: YS, AM, EJW, AL, PME. Analyzed the data: YS, AM, EJW, PME. Wrote  
447 the paper: PME.

448

449

450

451

452

453

454

455

456

457

458

459

460

461

462

463

464

465

466

467

468

469

470 **Figures and figure legends**

**Figure 1**

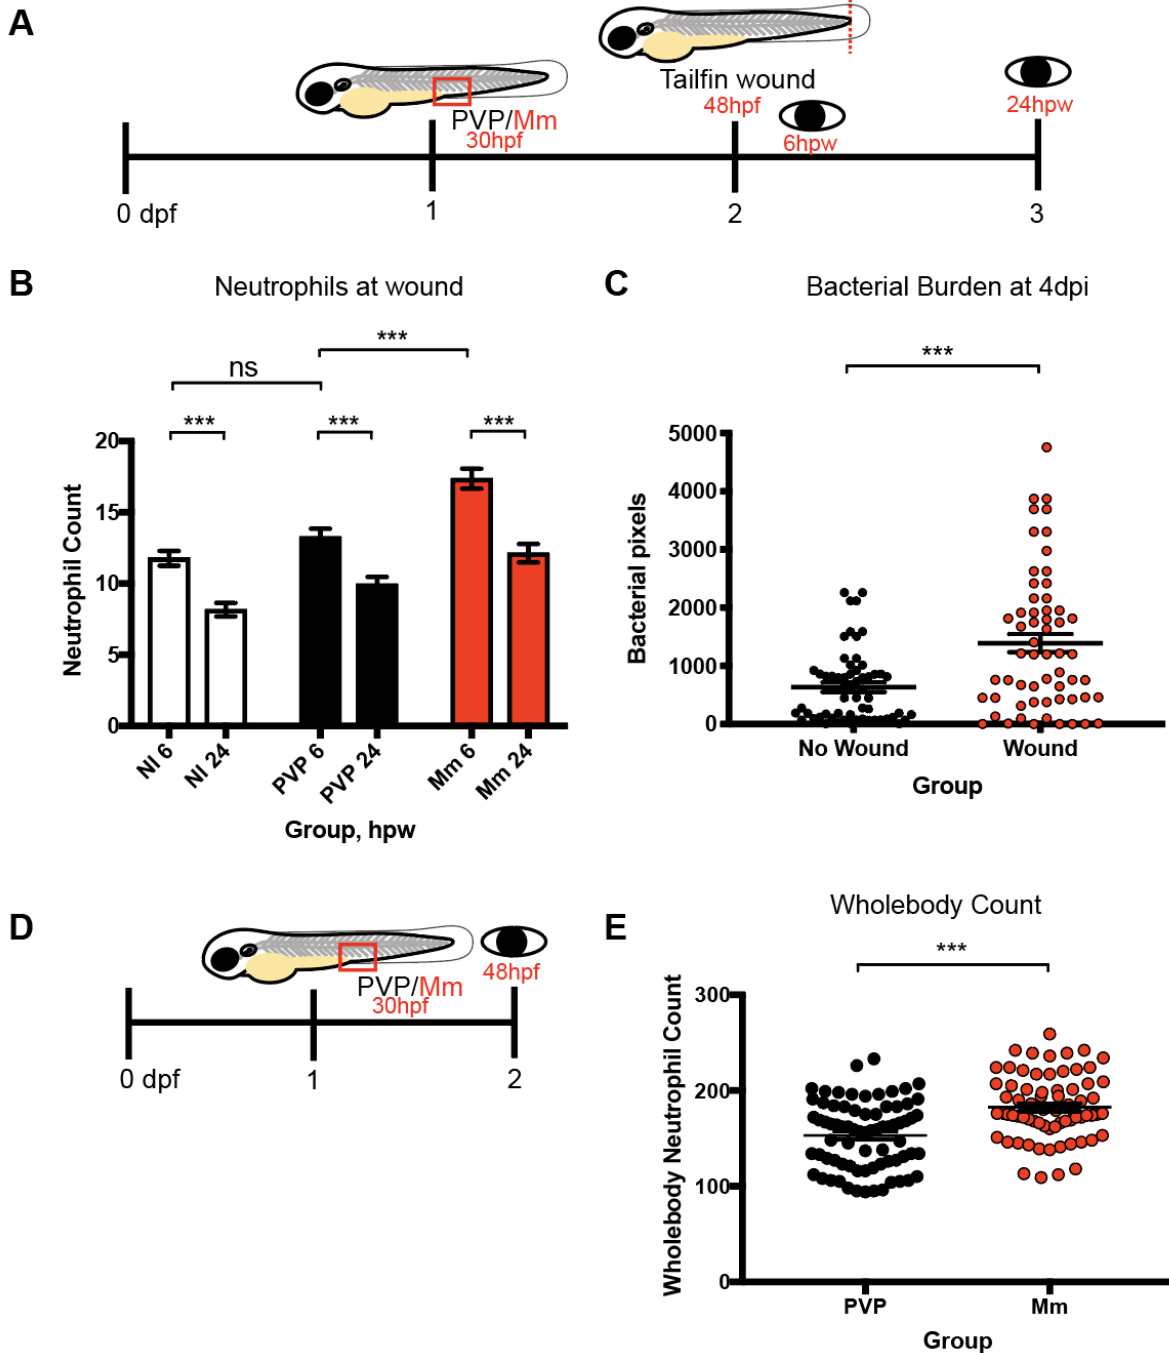

471

472 **Figure 1: Mm Infection induced neutrophil emergency haematopoiesis and**

473 **increased neutrophilic inflammation to the detriment of infection control**

474 (A) Schematic of experiment for B-C.

475 (B) Neutrophil numbers at the wound at 6 and 24 hours post wound (hpw). Groups are  
476 not injected (NI), control injection with PVP (PVP) and Mm injection (Mm). Data shown  
477 are mean  $\pm$  SEM, n=75-85 accumulated from 3 independent experiments.

478 (C) Bacterial burden of larvae with or without a tailfin wound. Data shown are mean  $\pm$   
479 SEM, n=58 accumulated from 3 independent experiments.

480 (D) Schematic of experiment for E.

481 (E) Total, whole-body neutrophil numbers at 2dpf, after 18 hours post infection (hpi)  
482 with PVP or Mm. Data shown are mean  $\pm$  SEM, n=69-74 accumulated from 3  
483 independent experiments.

484

## Figure 2

A

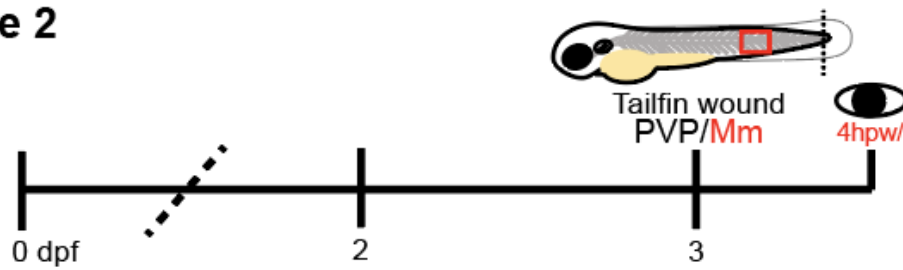

B

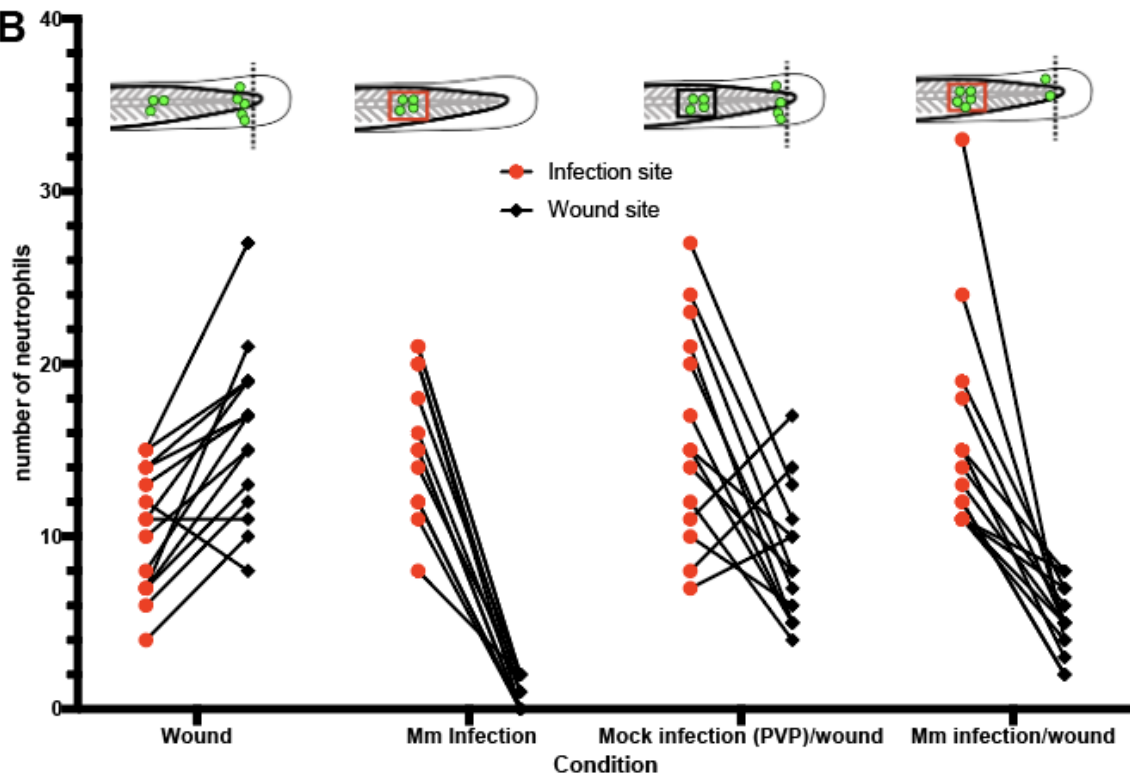

C

Neutrophils at infection

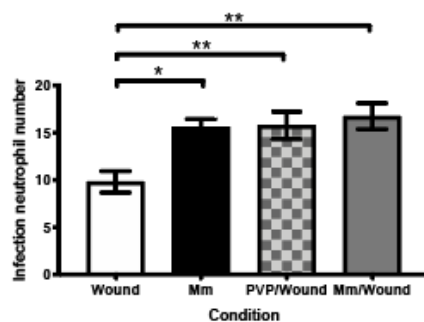

D

Neutrophils at wound

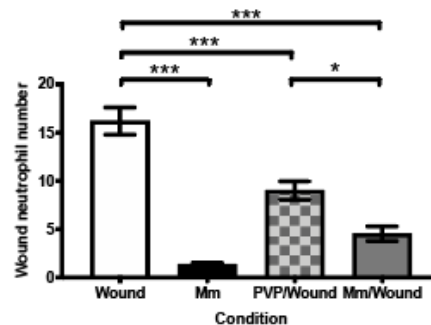

485

486 **Figure 2: Neutrophils distributed to local infection and wound sites**

487 (A) Schematic of experiment for B-D.

488 (B) Number of neutrophils at site of infection and tailfin wound at 4hpi/w. Data shown

489 are mean  $\pm$  SEM, n=9-13 representative of 3 independent experiments.

490 (C) Neutrophil numbers at the infection site at 4hpi. Data shown are mean  $\pm$  SEM,  
491 n=9-13 representative of 3 independent experiments.

492 (D) Neutrophil numbers at the wound site at 4hpi. Data shown are mean  $\pm$  SEM, n=9-  
493 13 representative of 3 independent experiments.

494

495

496

497

498

499

500

501

502

503

504

505

506

**Figure 3**

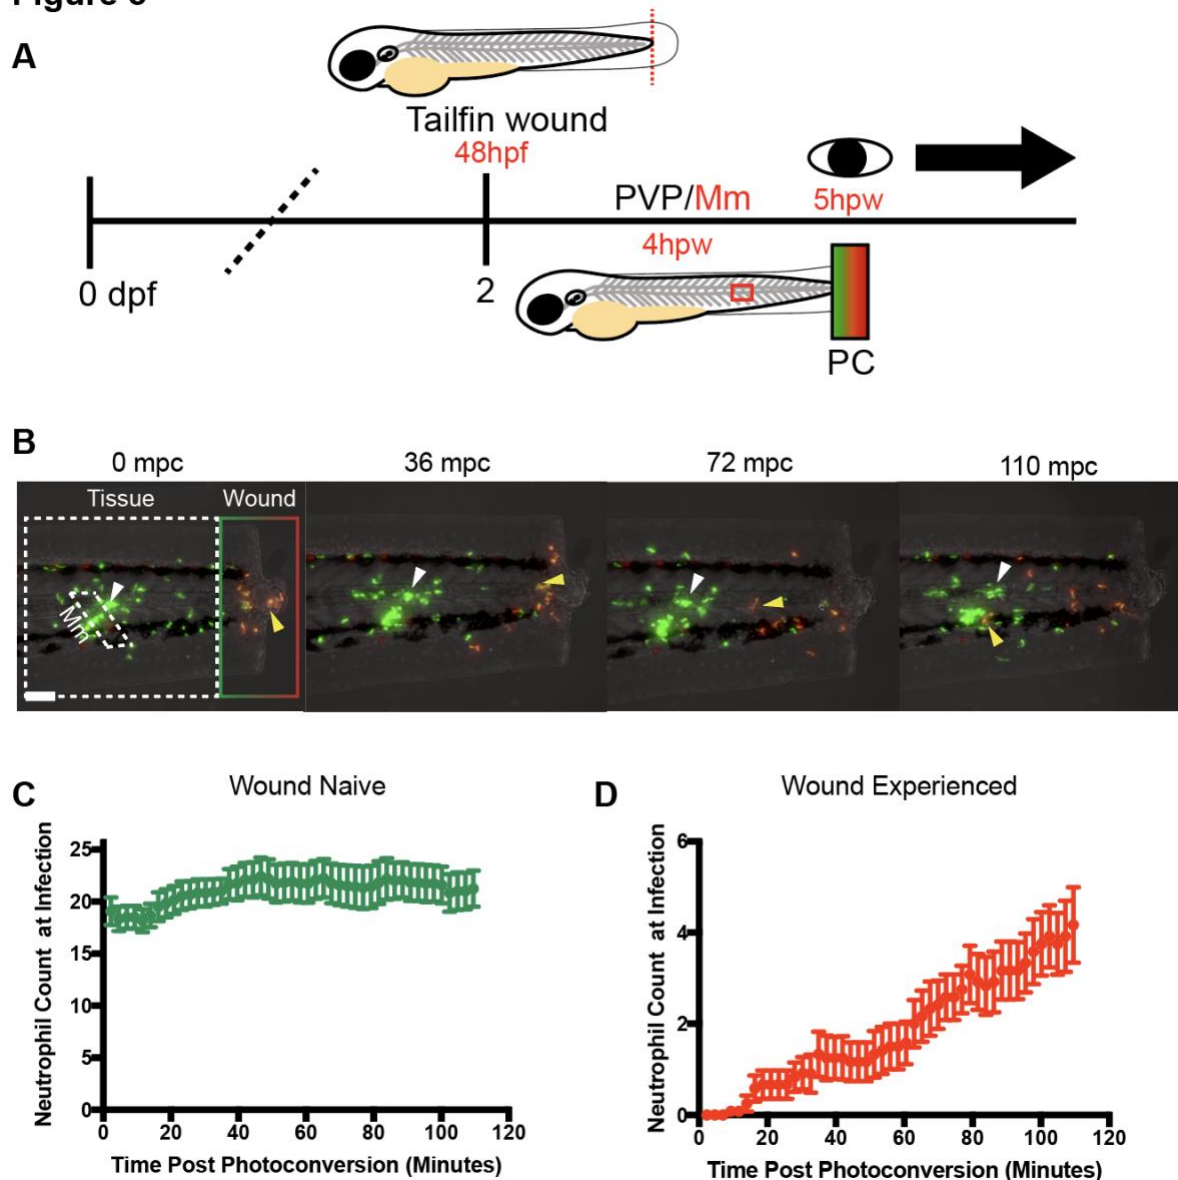

507

508 **Figure 3: Neutrophils preferentially migrated to a new infection stimulus rather**  
509 **than patrol a wound site**

510 (A) Schematic of experiment for B-D.

511 (B) Stereo-fluorescence micrographs of a tailfin transected embryo after 26/27<sup>th</sup>  
512 somite infection with Mm. Wound-naïve neutrophils are green only and those  
513 photoconverted at the wound at timepoint zero (wound-experienced) begin as red-only  
514 and regain GFP (therefore giving a yellow overlay) over the course of the timelapse  
515 as nascent Kaede fluorescent protein is made. Both wound-naïve (white arrowhead)



516 and wound-experienced (yellow arrowhead) are recruited to the localised site of Mm  
517 infection before 110 minutes post conversion (mpc), even though the timelapse is  
518 begun at 5hpw, a timepoint when neutrophils would normally still be recruited to the  
519 tailfin transection.

520 (C) Number of green, wound-naïve neutrophils at infection site over 1.5hpi. Data  
521 shown are mean  $\pm$  SEM, n=12 embryos accumulated from 3 independent  
522 experiments.

523 (D) Number of red, wound-experienced neutrophils at infection site over 1.5hpi. Data  
524 shown are mean  $\pm$  SEM, n=12 embryos accumulated from 3 independent  
525 experiments.

**Figure 4**

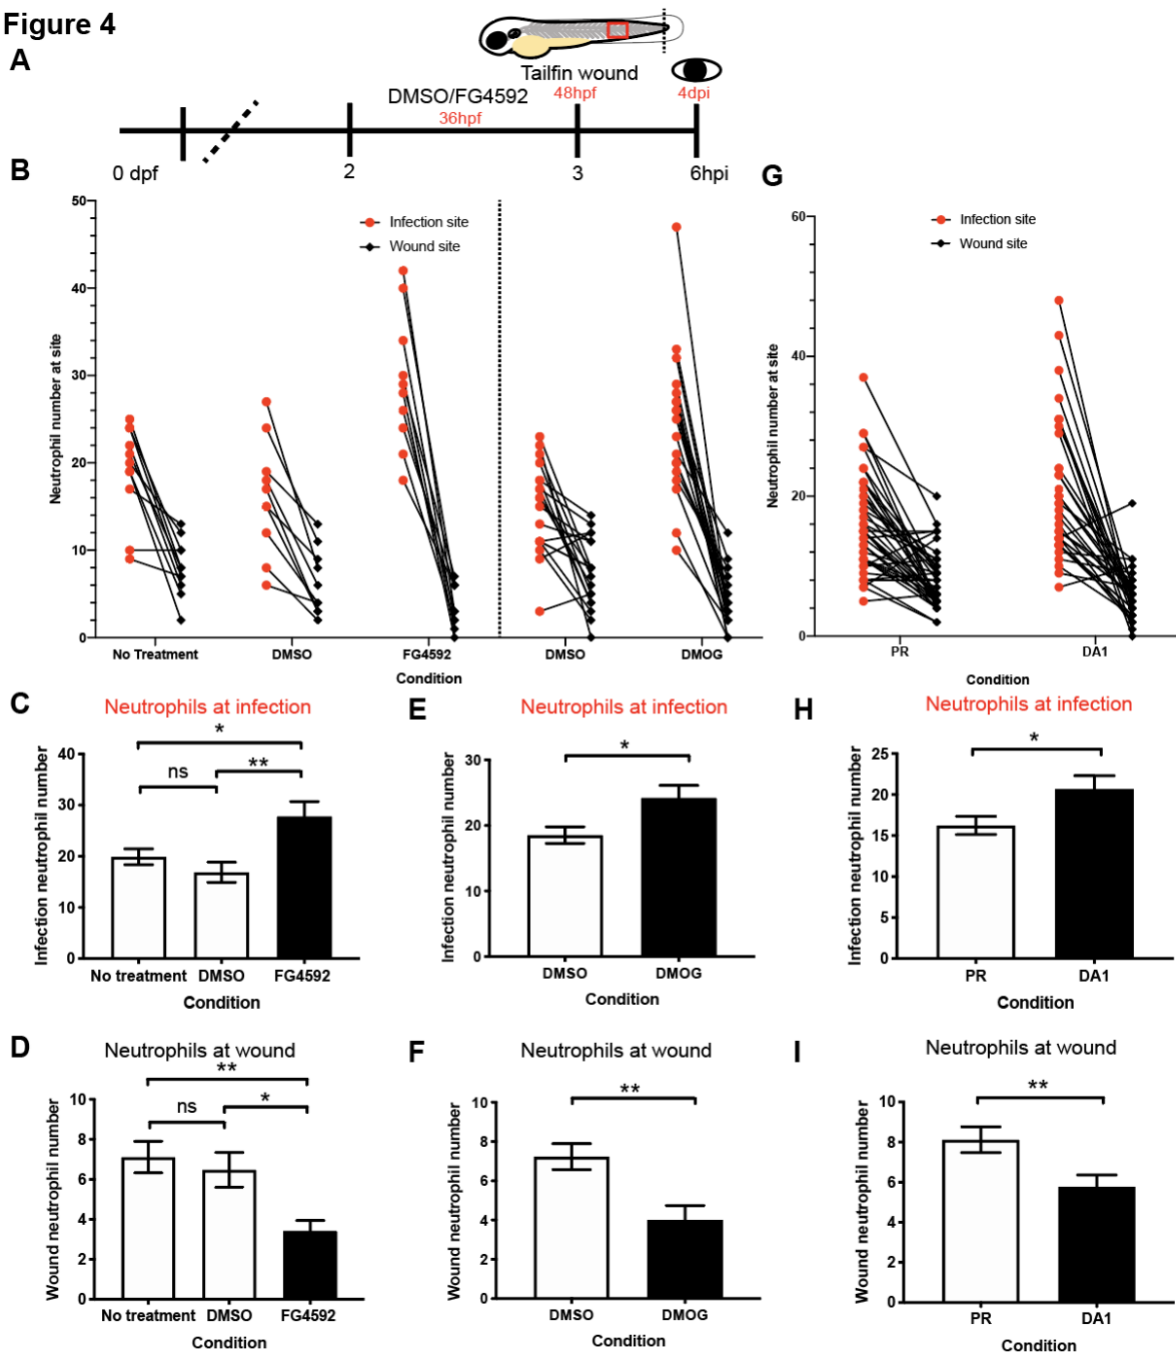

526

527 **Figure 4: Hif-1 $\alpha$  stabilisation retained neutrophils at infection at the expense of**  
 528 **migration to tailfin wound**

529 (A) Schematic of experiment for B-F.

530 (B) Number of neutrophils at site of infection and tailfin wound at 4hpi/w after Hif-1 $\alpha$

531 stabilisation with FG4592 or DMOG with No treatment and DMSO controls. Data

532 shown are mean  $\pm$  SEM, n=9-15 representative of 3 independent experiments.

533 (C) Neutrophil numbers at the infection site at 4hpi with DMSO and FG4592 treatment.  
534 Data shown are mean  $\pm$  SEM, n=10-11 representative of 3 independent experiments.  
535 (D) Neutrophil numbers at the wound site at 4hpi with DMSO and FG4592 treatment.  
536 Data shown are mean  $\pm$  SEM, n=10-11 representative of 3 independent experiments.  
537 (E) Neutrophil numbers at the infection site at 4hpi with DMSO and DMOG treatment.  
538 Data shown are mean  $\pm$  SEM, n=19 representative of 3 independent experiments.  
539 (F) Neutrophil numbers at the wound site at 4hpi with DMSO and DMOG treatment.  
540 Data shown are mean  $\pm$  SEM, n=19 representative of 3 independent experiments.  
541 (G) Number of neutrophils at site of infection and tailfin wound at 4hpi/w after Hif-1 $\alpha$   
542 stabilisation with dominant active Hif-1 $\alpha$  (DA1) or phenol red (PR) controls. Data  
543 shown are mean  $\pm$  SEM, n=20-22 representative of 3 independent experiments.  
544 (H) Neutrophil numbers at the infection site at 4hpi with PR and DA1. Data shown are  
545 mean  $\pm$  SEM, n=19 representative of 3 independent experiments.  
546 (I) Neutrophil numbers at the wound site at 4hpi with PR and DA1 treatment. Data  
547 shown are mean  $\pm$  SEM, n=36-41 accumulated from 3 independent experiments.  
548

**Figure 5**

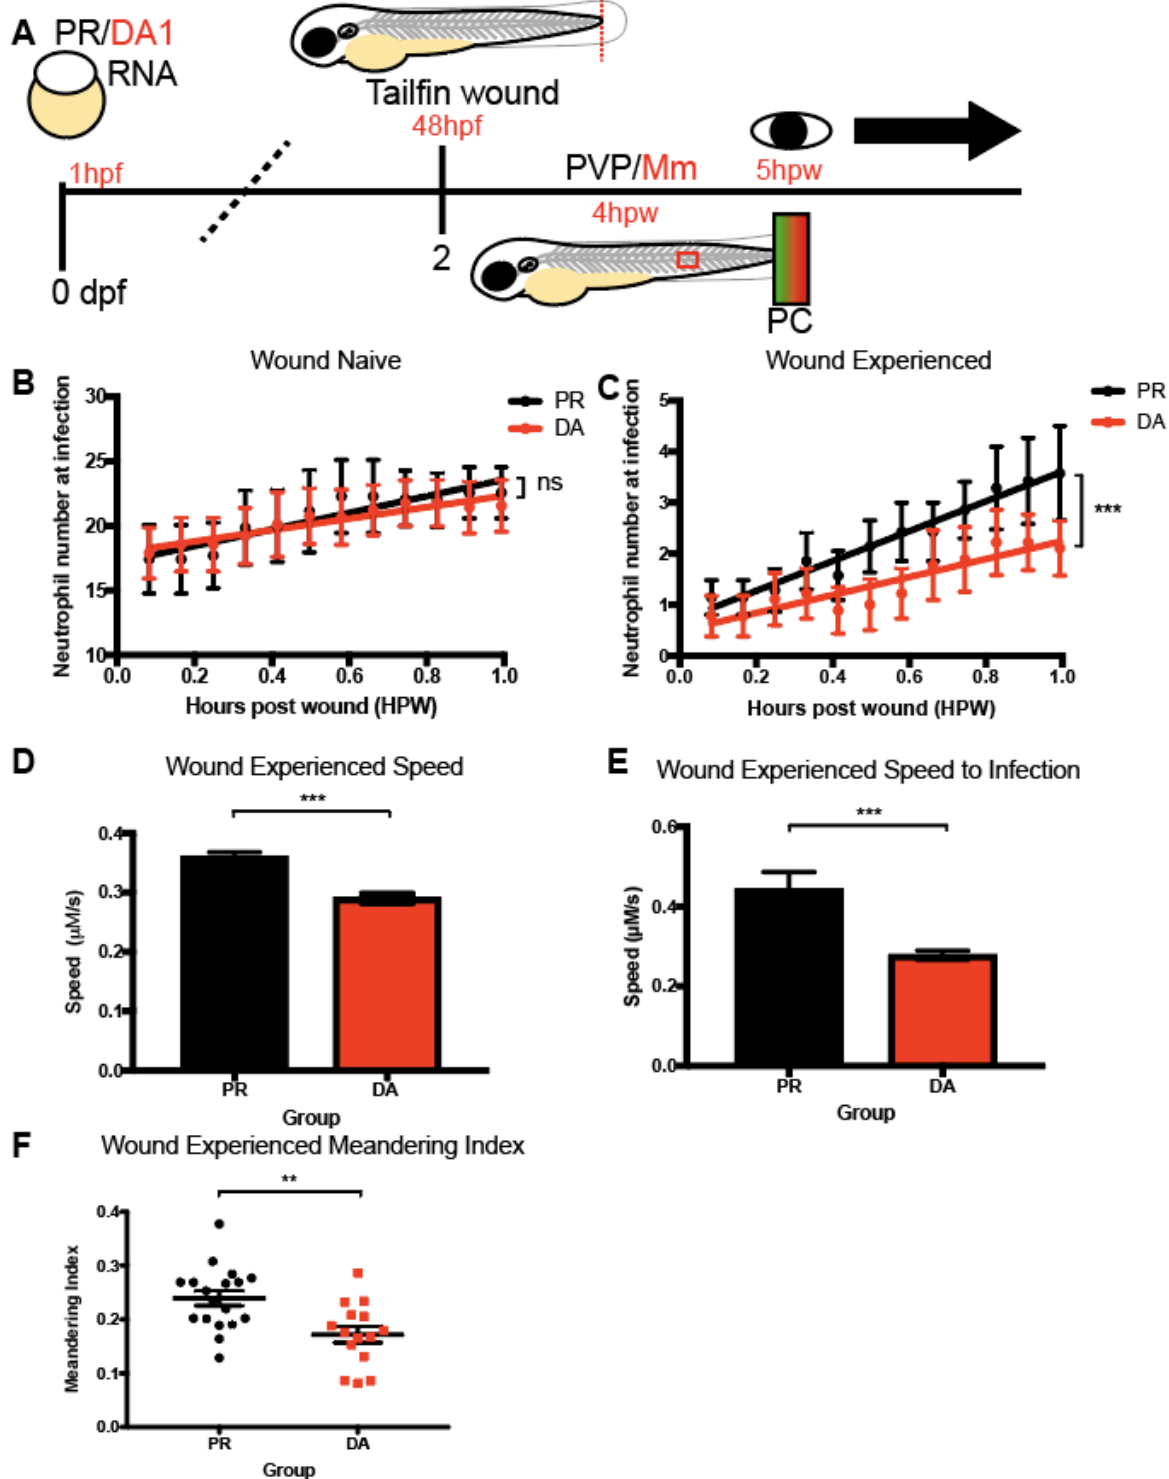

549

550 **Figure 5: Stabilisation of Hif-1 $\alpha$  delayed the migration of wound-experienced**  
 551 **neutrophils to a local site of Mm infection.**

552 (A) Schematic of experiment for B-F.

553 (B) Number of green, wound-naïve neutrophils at infection site over 1 hour post wound  
554 (hpw). Groups shown are DA Hif-1 $\alpha$  (DA, red points) and phenol red controls (PR,  
555 black points). Data shown are mean  $\pm$  SEM, n=7-9 embryos accumulated from 3  
556 independent experiments. Line of best fit shown is calculated by linear regression. P  
557 value shown is for the difference between the 2 slopes.

558 (C) Number of red, wound-experienced neutrophils at infection site over 1 hpw.  
559 Groups shown are DA Hif-1 $\alpha$  (DA, red points) and phenol red controls (PR, black  
560 points). Data shown are mean  $\pm$  SEM, n=7-9 embryos accumulated from 3  
561 independent experiments. Line of best fit shown is calculated by linear regression. P  
562 value shown is for the difference between the 2 slopes.

563 (D) Speed of red, wound-experienced neutrophil movement at the wound site. Groups  
564 shown are DA Hif-1 $\alpha$  (DA) and phenol red controls (PR). Data shown are mean  $\pm$   
565 SEM, n=5-6 embryos accumulated from 3 independent experiments.

566 (E) Speed of red, wound-experienced neutrophils migrating from the wound site to the  
567 infection site. Groups shown are DA Hif-1 $\alpha$  (DA) and phenol red controls (PR). Data  
568 shown are mean  $\pm$  SEM, n=5-6 embryos accumulated from 3 independent  
569 experiments.

570 (F) Meandering index of red, wound-experienced neutrophils migrating from the  
571 wound site to the infection site. Groups shown are DA Hif-1 $\alpha$  (DA) and phenol red  
572 controls (PR). Data shown are mean  $\pm$  SEM, n=15-18 embryos accumulated from 2  
573 independent experiments.

**Figure 6**

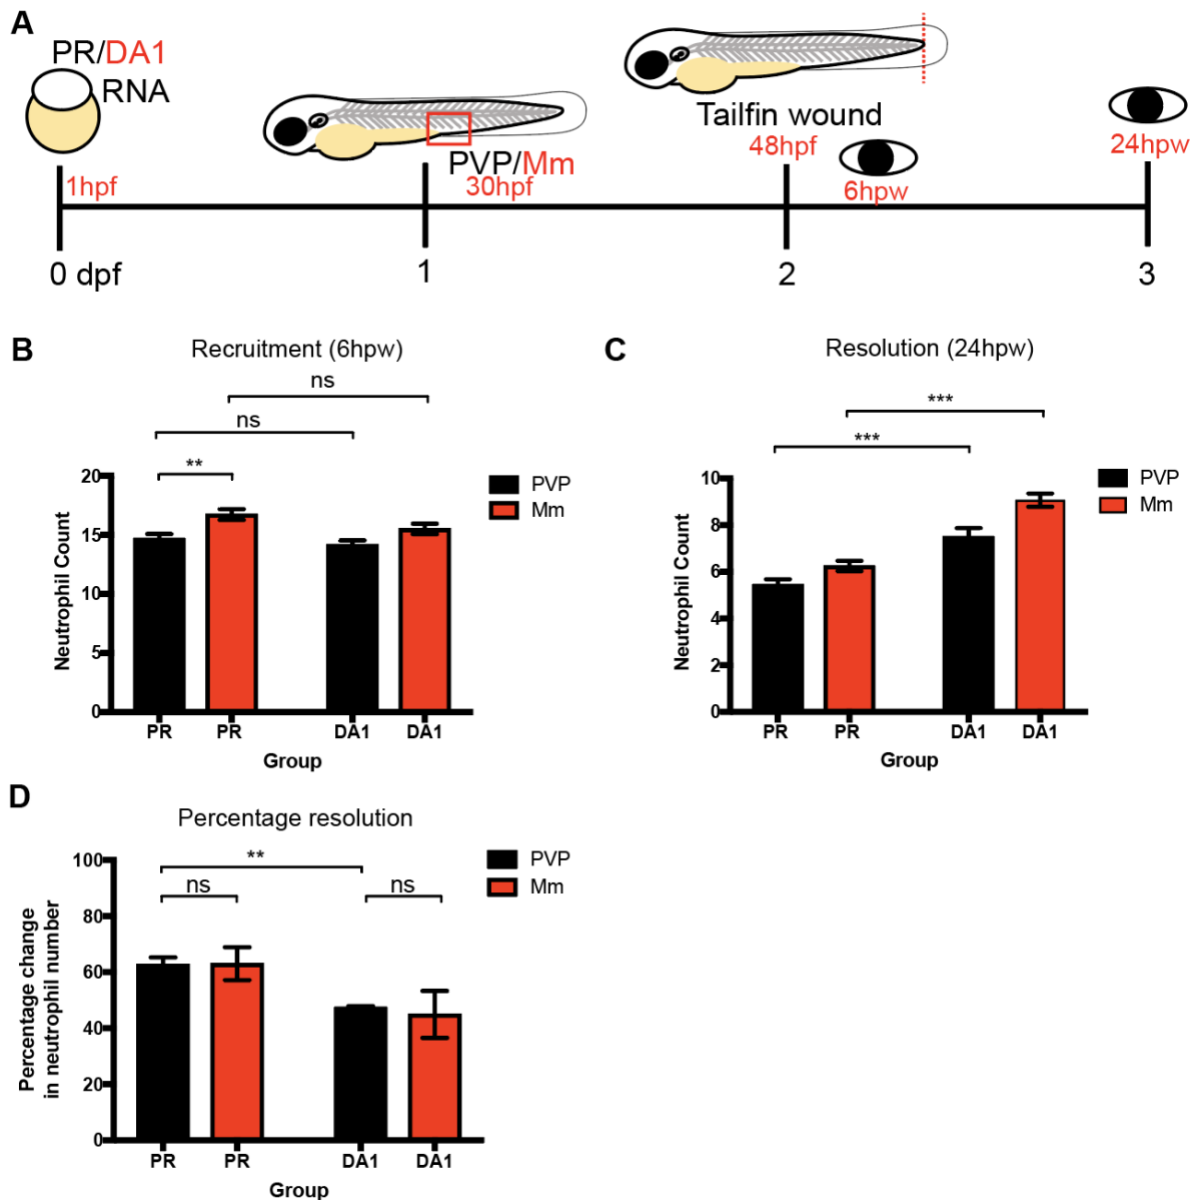

574

575 **Figure 6: Stabilisation of Hif-1 $\alpha$  delayed neutrophil inflammation resolution in**  
 576 **the presence of systemic Mm infection.**

577 (A) Schematic of experiment for B-D.

578 (B) Neutrophil numbers recruited to the tailfin wound at 6hpw. Groups are phenol red

579 (PR) and DA Hif-1 $\alpha$  (DA) injected at 30hpf with PVP or Mm. Data shown are mean  $\pm$

580 SEM, n=62-111 accumulated from 3 independent experiments.

581 (C) Neutrophil numbers at the tailfin wound at 24hpw. Groups are phenol red (PR) and  
582 DA Hif-1 $\alpha$  (DA) injected at 30hpf with PVP or Mm. Data shown are mean  $\pm$  SEM, n=62-  
583 111 accumulated from 3 independent experiments.

584 (D) Percentage resolution of neutrophil inflammation (between 6 to 24 hpw). Groups  
585 are phenol red (PR) and DA Hif-1 $\alpha$  (DA) injected at 30hpf with PVP or Mm. Data shown  
586 are mean  $\pm$  SEM, n=62-111 accumulated from 3 independent experiments.

587

588

589

590

Figure 7

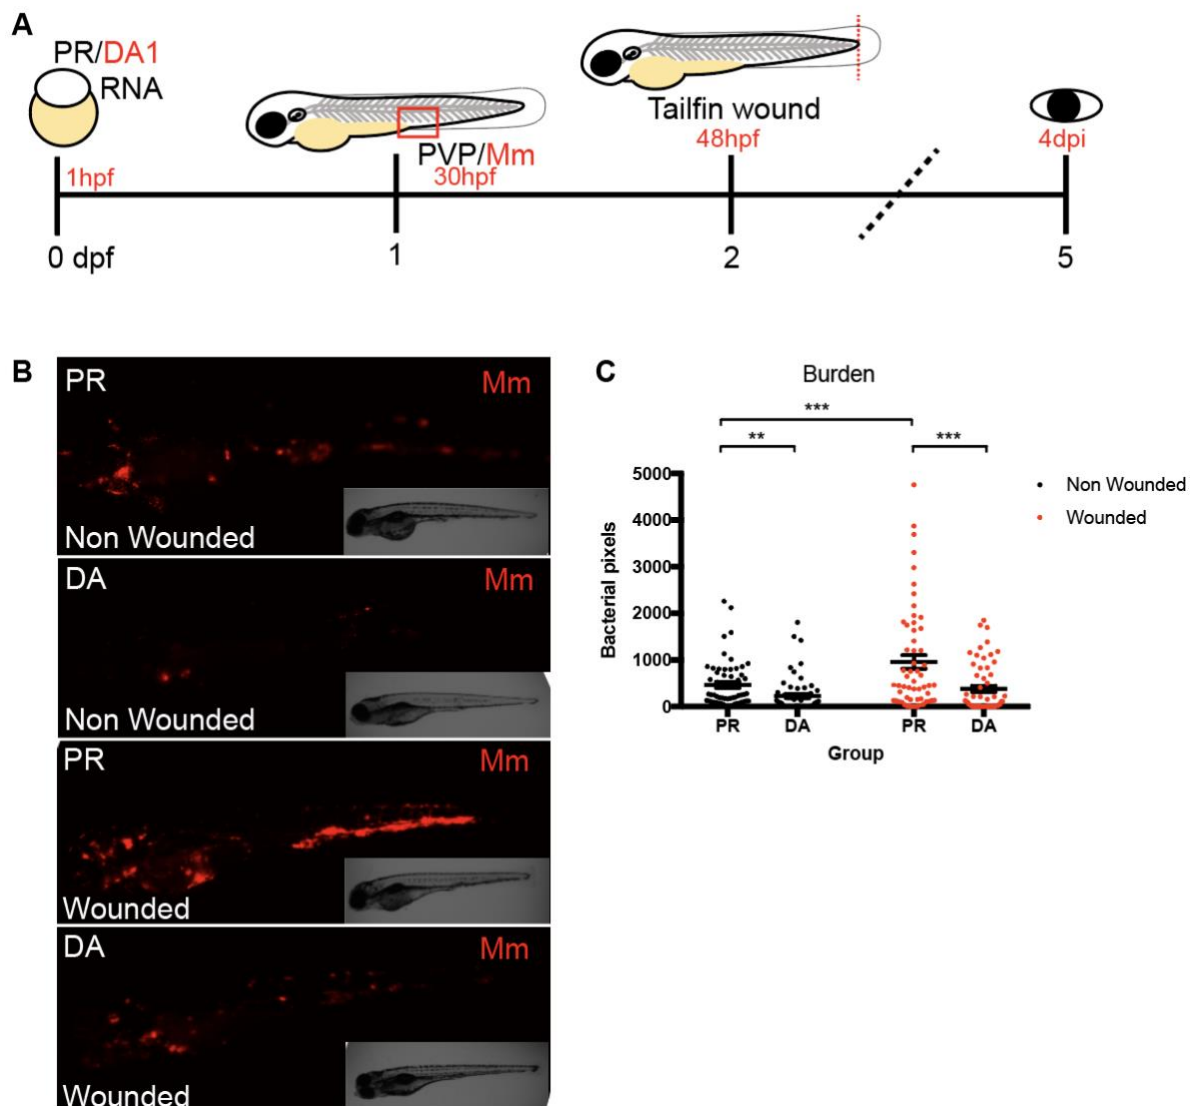

591

592 **Figure 7: Mm burden was increased after tailfin wounding but control by Hif-1 $\alpha$**   
593 **stabilisation was maintained.**

594 (A) Schematic of experiment for B-C.

595 (B) Stereo-fluorescence micrographs of Mm mCherry infected 4dpi larvae after  
596 injection with DA Hif-1 $\alpha$  (DA1) and phenol red (PR) as a negative control and either  
597 wounded at 48hpf or non-wounded.

598 (C) Bacterial burden of larvae shown in (B). Data shown are mean  $\pm$  SEM, n=58  
599 accumulated from 3 independent experiments.

600



601 **References**

- 602 1 World Health Organisation (2018) *Global Health TB Report*.
- 603 2 Zumla A, Rao M, Parida SK, Keshavjee S, Cassell G, Wallis R, Axelsson-  
604 Robertsson R, Doherty M, Andersson J & Maeurer MJ (2015) Inflammation and  
605 tuberculosis: Host-directed therapies. *J. Intern. Med.* **277**, 373–387.
- 606 3 Lowe DM, Redford PS, Wilkinson RJ, O’Garra A & Martineau AR (2012)  
607 Neutrophils in tuberculosis: friend or foe? *Trends Immunol* **33**, 14–25.
- 608 4 De Oliveira S, Rosowski EE & Huttenlocher A (2016) Neutrophil migration in  
609 infection and wound repair: Going forward in reverse. *Nat. Rev. Immunol.*
- 610 5 Tan RST, Ho B, Leung BP & Ding JL (2014) TLR cross-talk confers specificity to  
611 innate immunity. *Int. Rev. Immunol.*
- 612 6 Yang CT, Cambier CJ, Davis JM, Hall CJ, Crosier PS & Ramakrishnan L (2012)  
613 Neutrophils exert protection in the early tuberculous granuloma by oxidative  
614 killing of mycobacteria phagocytosed from infected macrophages. *Cell Host*  
615 *Microbe* **12**, 301–312.
- 616 7 Pedrosa J, Saunders BM, Appelberg R, Orme IM, Silva MT & Cooper AM (2000)  
617 Neutrophils play a protective nonphagocytic role in systemic Mycobacterium  
618 tuberculosis infection of mice. *Infect. Immun.* **68**, 577–583.
- 619 8 Fulton SA, Reba SM, Martin TD & Boom WH (2002) Neutrophil-mediated  
620 mycobacteriocidal immunity in the lung during Mycobacterium bovis BCG  
621 infection in C57BL/6 mice. *Infect. Immun.* **70**, 5322–5327.
- 622 9 Hoenderdos K & Condliffe A (2013) The neutrophil in chronic obstructive  
623 pulmonary disease. *Am. J. Respir. Cell Mol. Biol.*
- 624 10 Loynes CA, Martin JS, Robertson A, Trushell DM, Ingham PW, Whyte MK &  
625 Renshaw SA (2010) Pivotal Advance: Pharmacological manipulation of

- 626 inflammation resolution during spontaneously resolving tissue neutrophilia in the  
627 zebrafish. *J Leukoc Biol* **87**, 203–212.
- 628 11 Thompson AAR, Elks PM, Marriott HM, Eamsamrנג S, Higgins KR, Lewis A,  
629 Williams L, Parmar S, Shaw G, McGrath EE, Formenti F, Van Eeden FJ,  
630 Kinnula VL, Pugh CW, Sabroe I, Dockrell DH, Chilvers ER, Robbins PA, Percy  
631 MJ, Simon MC, Johnson RS, Renshaw SA, Whyte MKB & Walmsley SR (2014)  
632 Hypoxia-inducible factor 2a regulates key neutrophil functions in humans, mice,  
633 and zebrafish. *Blood* **123**.
- 634 12 Elks PM, Van Eeden FJ, Dixon G, Wang X, Reyes-Aldasoro CC, Ingham PW,  
635 Whyte MKB, Walmsley SR & Renshaw SA (2011) Activation of hypoxia-  
636 inducible factor-1 $\alpha$  (hif-1 $\alpha$ ) delays inflammation resolution by reducing neutrophil  
637 apoptosis and reverse migration in a zebrafish inflammation model. *Blood* **118**.
- 638 13 Bates M, Marais BJ & Zumla A (2015) Tuberculosis comorbidity with  
639 communicable and noncommunicable diseases. *Cold Spring Harb. Perspect.*  
640 *Med.* **5**.
- 641 14 Sbrana E, Grise J, Stout C & Aronson J (2011) Co-morbidities associated with  
642 tuberculosis in an autopsy case series. *Tuberculosis* **91**.
- 643 15 Hunter P (2012) The inflammation theory of disease. the growing realization that  
644 chronic inflammation is crucial in many diseases opens new avenues for  
645 treatment. *EMBO Rep.* **13**, 968–970.
- 646 16 Peyssonnaux C, Datta V, Cramer T, Doedens A, Theodorakis EA, Gallo RL,  
647 Hurtado-Ziola N, Nizet V & Johnson RS (2005) HIF-1alpha expression regulates  
648 the bactericidal capacity of phagocytes. *J Clin Invest* **115**, 1806–1815.
- 649 17 Nizet V & Johnson RS (2009) Interdependence of hypoxic and innate immune  
650 responses. *Nat. Rev. Immunol.* **9**, 609–617.

- 651 18 Cramer T, Yamanishi Y, Clausen BE, Förster I, Pawlinski R, Mackman N, Haase  
652 VH, Jaenisch R, Corr M, Nizet V, Firestein GS, Gerber HP, Ferrara N & Johnson  
653 RS (2003) HIF-1 $\alpha$  is essential for myeloid cell-mediated inflammation. *Cell* **112**,  
654 645–657.
- 655 19 Elks PM, Renshaw SA, Meijer AH, Walmsley SR & van Eeden FJ (2015)  
656 Exploring the HIFs, buts and maybes of hypoxia signalling in disease: lessons  
657 from zebrafish models. *Dis. Model. Mech.* **8**, 1349–1360.
- 658 20 Elks PM, Brizee S, van der Vaart M, Walmsley SR, van Eeden FJ, Renshaw SA  
659 & Meijer AH (2013) PLOS Pathogens: Hypoxia Inducible Factor Signaling  
660 Modulates Susceptibility to Mycobacterial Infection via a Nitric Oxide Dependent  
661 Mechanism. *PLoS Pathog.* **9**, e1003789.
- 662 21 Walmsley SR, Print C, Farahi N, Peyssonnaud C, Johnson RS, Cramer T,  
663 Sobolewski A, Condliffe AM, Cowburn AS, Johnson N & Chilvers ER (2005)  
664 Hypoxia-induced neutrophil survival is mediated by HIF-1  $\alpha$ -dependent NF- $\kappa$ B  
665 activity. *J. Exp. Med. JEM* **00**, 105–115.
- 666 22 Renshaw S a. & Trede NS (2012) A model 450 million years in the making:  
667 zebrafish and vertebrate immunity. *Dis. Model. Mech.* **5**, 38–47.
- 668 23 Meijer AH (2016) Protection and pathology in TB: learning from the zebrafish  
669 model. *Semin. Immunopathol.* **38**, 261–273.
- 670 24 Mathias JR, Perrin BJ, Liu T-X, Kanki J, Look AT & Huttenlocher A (2006)  
671 Resolution of inflammation by retrograde chemotaxis of neutrophils in transgenic  
672 zebrafish. *J. Leukoc. Biol.* **80**, 1281–1288.
- 673 25 Renshaw SA, Loynes CA, Trushell DM, Elworthy S, Ingham PW & Whyte MK  
674 (2006) A transgenic zebrafish model of neutrophilic inflammation. *Blood* **108**,  
675 3976–3978.

- 676 26 Nüsslein-Volhard C & Dham R (2002) Zebrafish: A practical approach. *New York*  
677 *Oxford Univ. Press*, 2002.
- 678 27 Robertson AL, Holmes GR, Bojarczuk AN, Burgon J, Loynes CA, Chimen M,  
679 Sawtell AK, Hamza B, Willson J, Walmsley SR, Anderson SR, Coles MC,  
680 Farrow SN, Solari R, Jones S, Prince LR, Irimia D, Ed Rainger G,  
681 Kadirkamanathan V, Whyte MKB & Renshaw SA (2014) A zebrafish compound  
682 screen reveals modulation of neutrophil reverse migration as an anti-  
683 inflammatory mechanism. *Sci. Transl. Med.* **6**.
- 684 28 van der Sar AM, Spaink HP, Zakrzewska A, Bitter W & Meijer AH (2009)  
685 Specificity of the zebrafish host transcriptome response to acute and chronic  
686 mycobacterial infection and the role of innate and adaptive immune  
687 components. *Mol. Immunol.* **46**, 2317–2332.
- 688 29 Benard EL, van der Sar AM, Ellett F, Lieschke GJ, Spaink HP & Meijer AH (2012)  
689 Infection of zebrafish embryos with intracellular bacterial pathogens. *J Vis Exp*.
- 690 30 Ellett F, Elks PM, Robertson AL, Ogryzko NV & Renshaw SA (2015) Defining the  
691 phenotype of neutrophils following reverse migration in zebrafish. *J. Leukoc.*  
692 *Biol.* **98**.
- 693 31 Santhakumar K, Judson EC, Elks PM, McKee S, Elworthy S, Van Rooijen E,  
694 Walmsley SS, Renshaw SA, Cross SS & Van Eeden FJM (2012) A zebrafish  
695 model to study and therapeutically manipulate hypoxia signaling in  
696 tumorigenesis. *Cancer Res.* **72**.
- 697 32 Elks PM, Van Der Vaart M, Van Hensbergen V, Schutz E, Redd MJ, Murayama  
698 E, Spaink HP & Meijer AH (2014) Mycobacteria counteract a TLR-mediated  
699 nitrosative defense mechanism in a zebrafish infection model. *PLoS One* **9**.
- 700 33 Renshaw S & Loynes C (2006) A transgenic zebrafish model of neutrophilic

- 701 inflammation. *Blood*... **108**, 3976–3978.
- 702 34 Davis JM, Clay H, Lewis JL, Ghori N, Herbomel P & Ramakrishnan L (2002)
- 703 Real-time visualization of mycobacterium-macrophage interactions leading to
- 704 initiation of granuloma formation in zebrafish embryos. *Immunity* **17**, 693–702.
- 705 35 Hall CJ, Flores M V, Oehlers SH, Sanderson LE, Lam EY, Crosier KE & Crosier
- 706 PS (2012) Infection-responsive expansion of the hematopoietic stem and
- 707 progenitor cell compartment in zebrafish is dependent upon inducible nitric
- 708 oxide. *Cell Stem Cell* **10**, 198–209.
- 709 36 Holmes GR, Dixon G, Anderson SR, Reyes-Aldasoro CC, Elks PM, Billings SA,
- 710 Whyte MKB, Kadiramanathan V & Renshaw SA (2012) Drift-diffusion analysis
- 711 of neutrophil migration during inflammation resolution in a zebrafish model. *Adv.*
- 712 *Hematol.* **2012**.
- 713 37 Wang X, Li C, Chen Y, Hao Y, Zhou W, Chen C & Yu Z (2008) Hypoxia enhances
- 714 CXCR4 expression favoring microglia migration via HIF-1 $\alpha$  activation. *Biochem.*
- 715 *Biophys. Res. Commun.* **371**, 283–288.
- 716 38 Guan G, Zhang Y, Lu Y, Liu L, Shi D, Wen Y, Yang L, Ma Q, Liu T, Zhu X, Qiu X
- 717 & Zhou Y (2015) The HIF-1 $\alpha$ /CXCR4 pathway supports hypoxia-induced
- 718 metastasis of human osteosarcoma cells. *Cancer Lett.* **357**, 254–264.
- 719 39 Walters KB, Green JM, Surfus JC, Yoo SK & Huttenlocher A (2010) Live imaging
- 720 of neutrophil motility in a zebrafish model of WHIM syndrome. *Blood* **116**, 2803–
- 721 2811.
- 722 40 Oh YS, Kim HY, Song IC, Yun HJ, Jo DY, Kim S & Lee HJ (2012) Hypoxia
- 723 induces CXCR4 expression and biological activity in gastric cancer cells through
- 724 activation of hypoxia-inducible factor-1 $\alpha$ . *Oncol. Rep.* **28**, 2239–2246.
- 725 41 Yamada M, Kubo H, Kobayashi S, Ishizawa K, He M, Suzuki T, Fujino N,

- 726 Kunishima H, Hatta M, Nishimaki K, Aoyagi T, Tokuda K, Kitagawa M, Yano H,  
727 Tamamura H, Fujii N & Kaku M (2011) The increase in surface CXCR4  
728 expression on lung extravascular neutrophils and its effects on neutrophils  
729 during endotoxin-induced lung injury. *Cell. Mol. Immunol.* **8**, 305–314.
- 730 42 Isles HM, Herman KD, Robertson AL, Loynes CA, Prince LR, Elks PM &  
731 Renshaw SA (2019) The CXCL12/CXCR4 Signaling Axis Retains Neutrophils at  
732 Inflammatory Sites in Zebrafish. *Front. Immunol.*
- 733 43 Ogryzko N V., Hoggett EE, Solaymani-Kohal S, Tazzyman S, Chico TJA,  
734 Renshaw SA & Wilson HL (2014) Zebrafish tissue injury causes upregulation of  
735 interleukin-1 and caspase-dependent amplification of the inflammatory  
736 response. *Dis. Model. Mech.* **7**, 259–264.
- 737 44 Ogryzko N V., Lewis A, Wilson HL, Meijer AH, Renshaw SA & Elks PM (2019)  
738 Hif-1 $\alpha$ -Induced Expression of Il-1 $\beta$  Protects against Mycobacterial Infection in  
739 Zebrafish. *J. Immunol.*
- 740
